# Supplementary material for: Self-passivated edges of ZnO nanoribbons: a global search
Source: Royal Society of Chemistry journal article supplement (doi:10.1039/d2nr02479a), 2022-01-01
Supplement: d2nr02479a1.pdf [file d2nr02479a1.pdf]

## Self-passivated Edges of ZnO Nanoribbon: A Global Search

Li-Ping Ding<sup>a</sup>, Yan Tang<sup>a</sup>, Peng Shao<sup>a,\*</sup>, Hui Zhang<sup>a</sup>, Yi-Jin Guo<sup>a</sup>, Jia-Hao Zeng<sup>a</sup> and Ya-Ru Zhao<sup>b</sup>

<sup>a</sup>Department of Optoelectronic Science & Technology, School of Electronic Information and Artificial Intelligence, Shaanxi University of Science & Technology, Xi'an 710021, China.

<sup>b</sup>School of Electrical and Electronic Engineering, Baoji University of Arts and Sciences, Baoji, China.

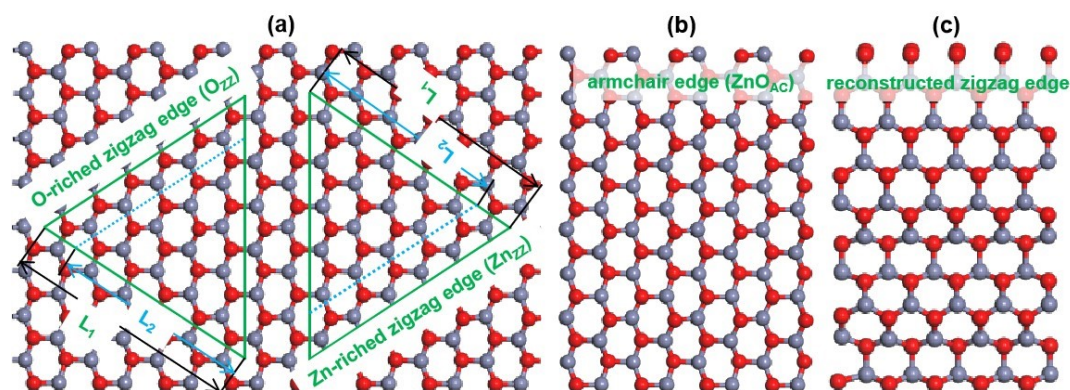

**Fig. S1** The representative structures which can be used to calculate edge formation energy. (a) Pristine zigzag edges with Zn-rich and O-rich, (b) pristine armchair edges, (c) reconstructed zigzag edges.

---

\*Correspondence to: Peng Shao, Department of Optoelectronic Science & Technology, School of Electronic Information and Artificial Intelligence, Shaanxi University of Science & Technology, Xi'an 710021, China.  
E-mail address: scu\_sp@163.com

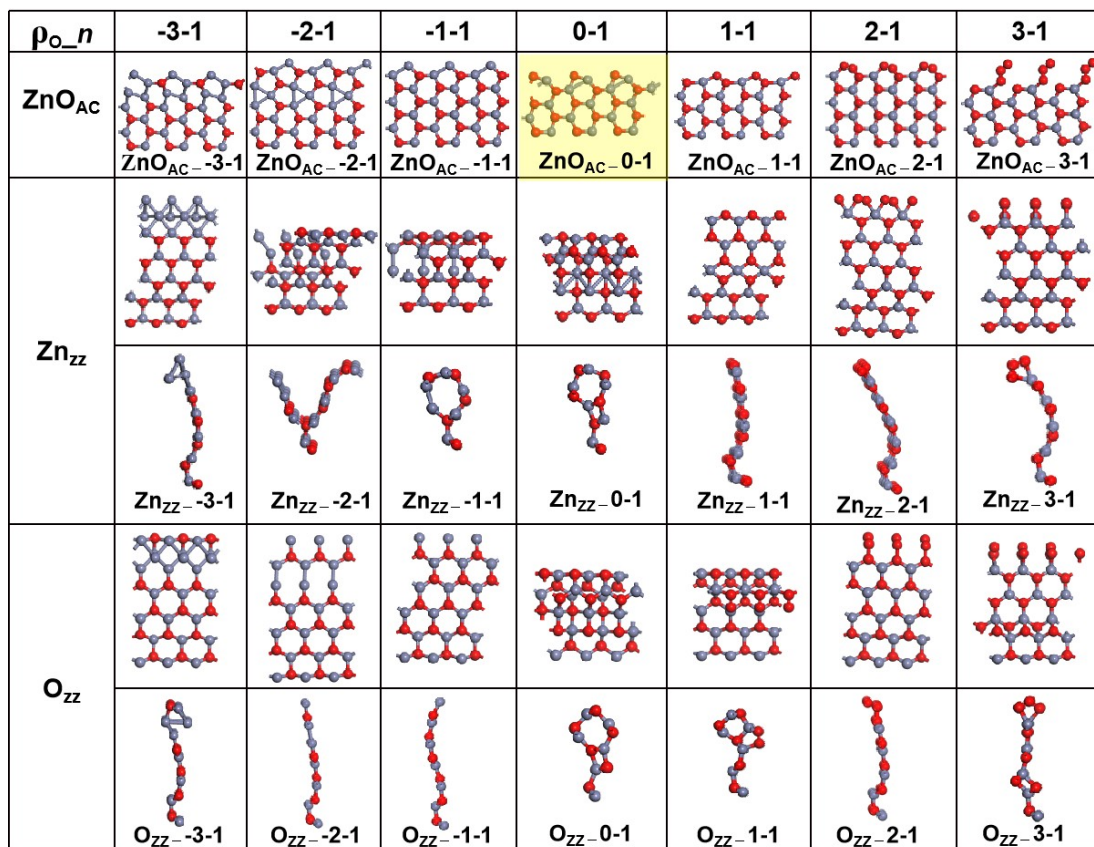

**Fig. S2** Top and side views of the first low-lying reconstructed structures of the  $ZnO_{AC}$ ,  $Zn_{ZZ}$  and  $O_{ZZ}$  edges at various different concentration of oxygen. The red and gray spheres represent oxygen and zinc atoms, respectively. The structure with yellow background can be obtained by slightly distorting pristine armchair edge.

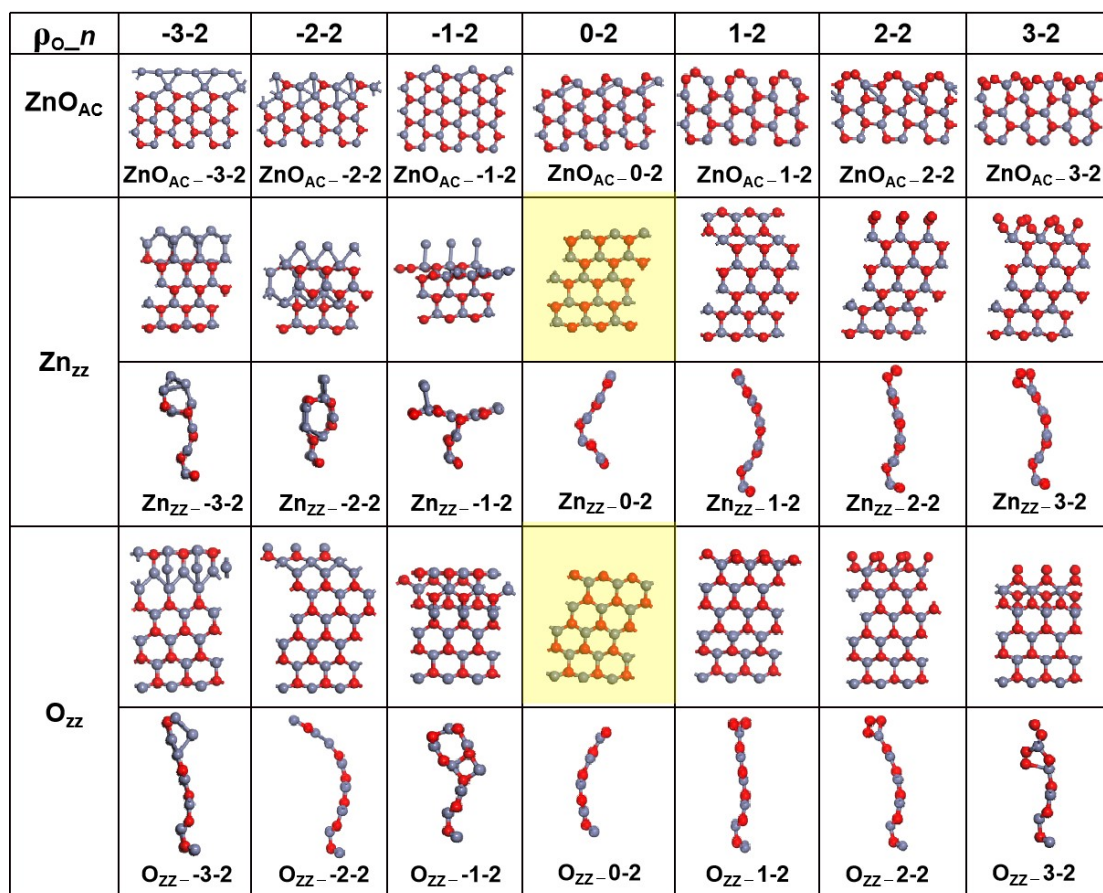

**Fig. S3** Top and side views of the second low-lying reconstructed structures of the  $ZnO_{AC}$ ,  $Zn_{ZZ}$  and  $O_{ZZ}$  edges at various different concentration of oxygen. The red and gray spheres represent oxygen and zinc atoms, respectively. The structures with yellow background are pristine zigzag edges.

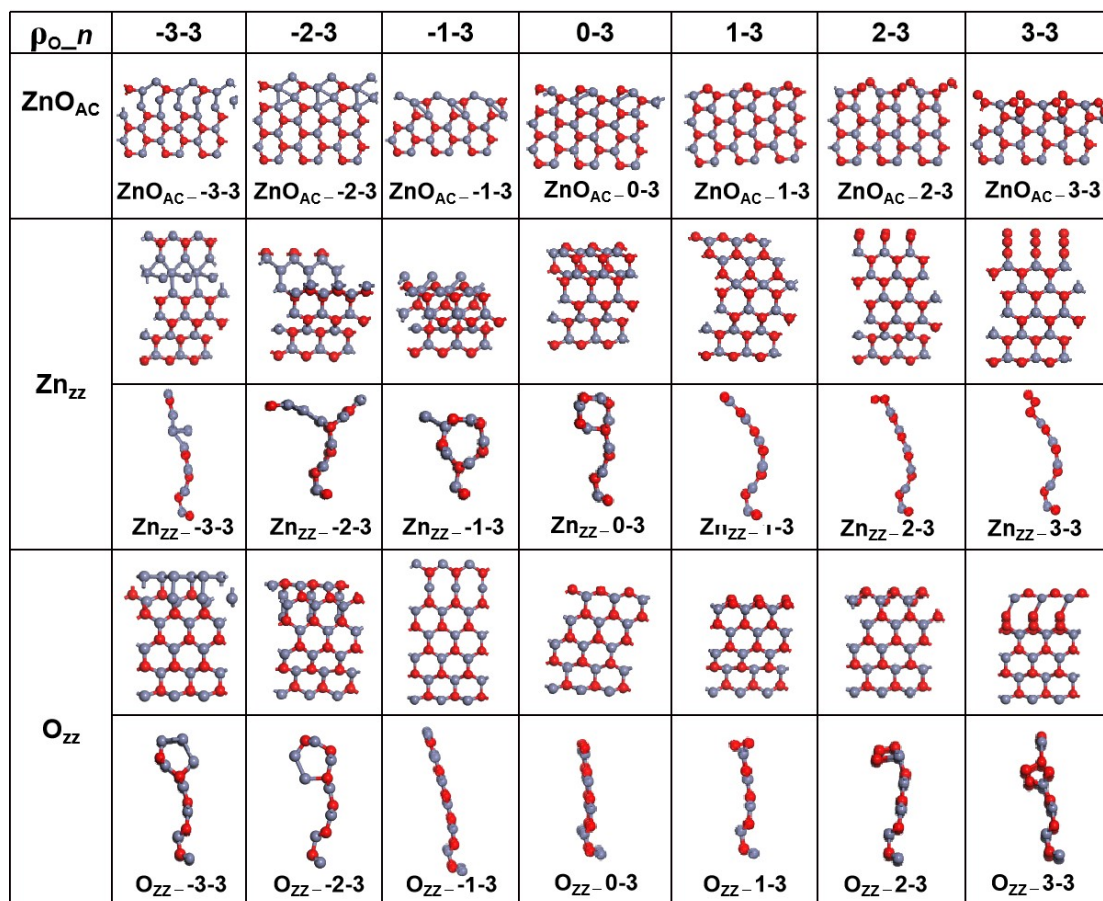

**Fig. S4** Top and side views of the third low-lying edge reconstructed structures of the  $ZnO_{AC}$ ,  $Zn_{ZZ}$  and  $O_{ZZ}$  edges at various different concentration of oxygen. The red and gray spheres represent oxygen and zinc atoms, respectively.

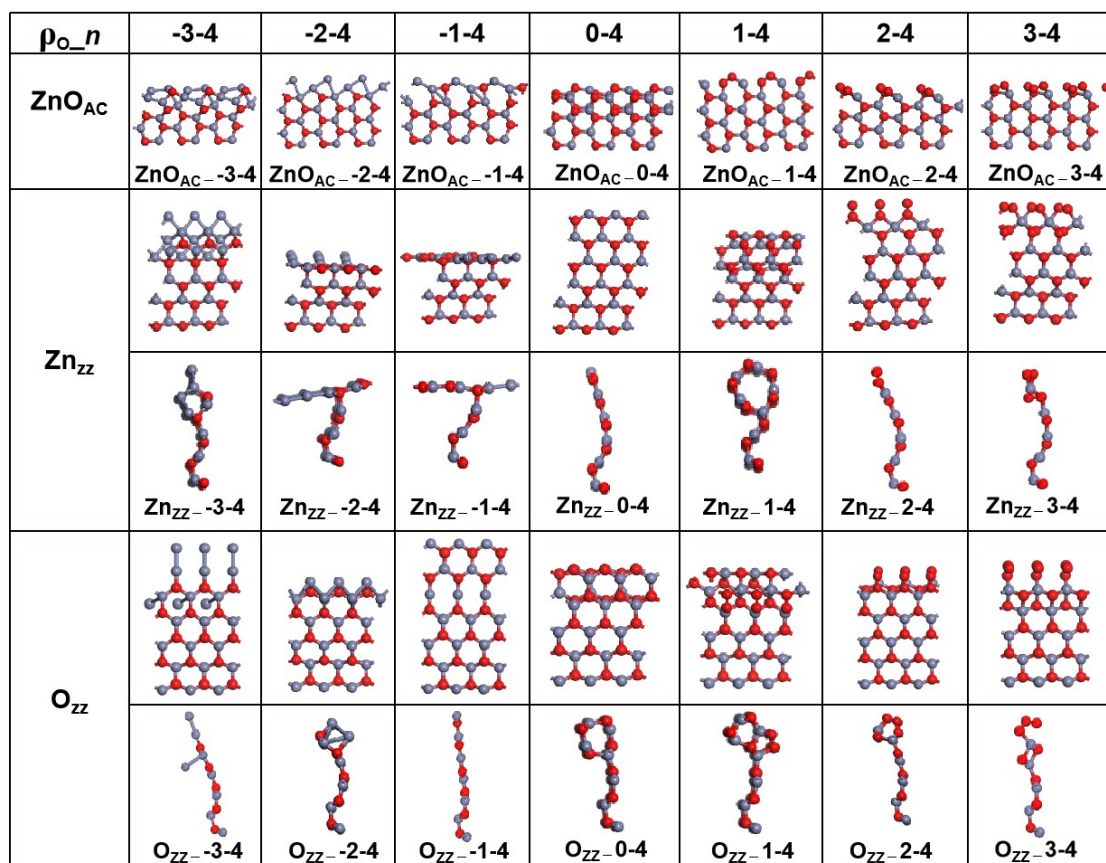

**Fig. S5** Top and side views of the fourth low-lying reconstructed structures of the  $ZnO_{AC}$ ,  $Zn_{ZZ}$  and  $O_{ZZ}$  edges at various different concentration of oxygen. The red and gray spheres represent oxygen and zinc atoms, respectively.

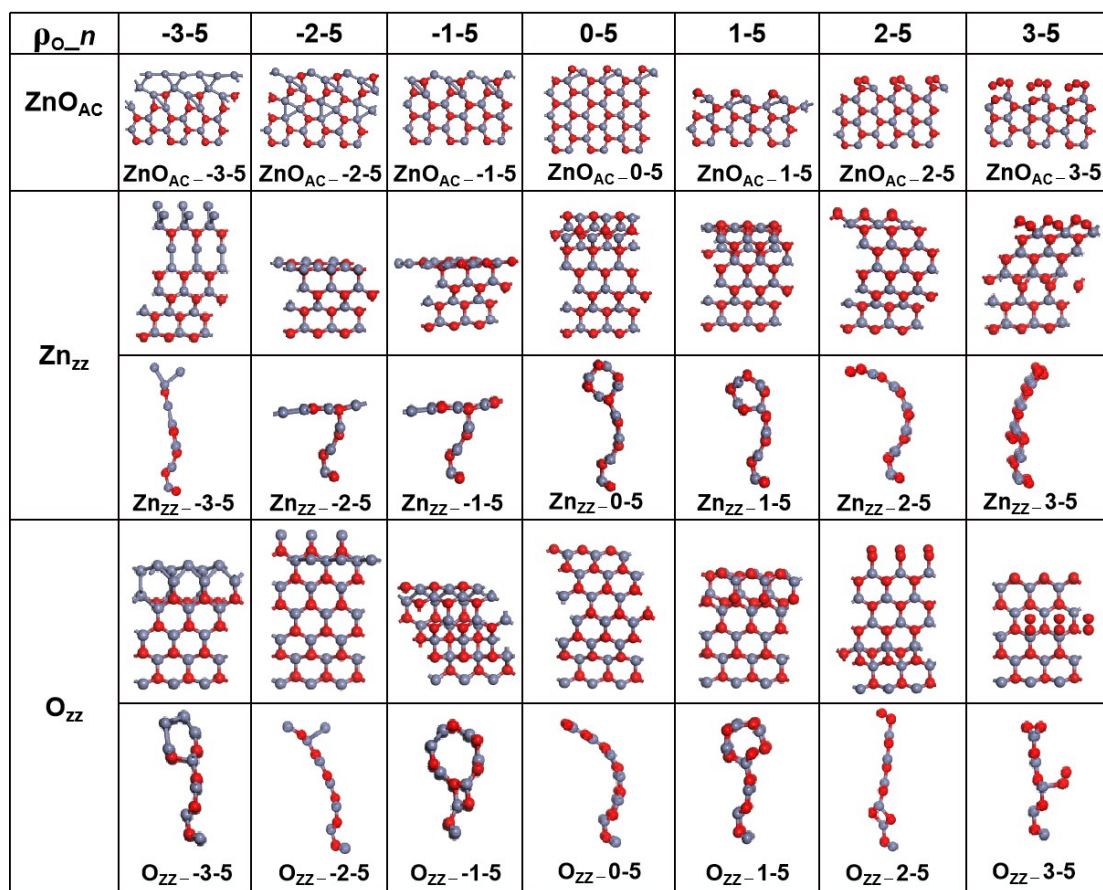

**Fig. S6** Top and side views of the fifth low-lying reconstructed structures of the  $ZnO_{AC}$ ,  $Zn_{ZZ}$  and  $O_{ZZ}$  edges at various different concentration of oxygen. The red and gray spheres represent oxygen and zinic atoms, respectively.

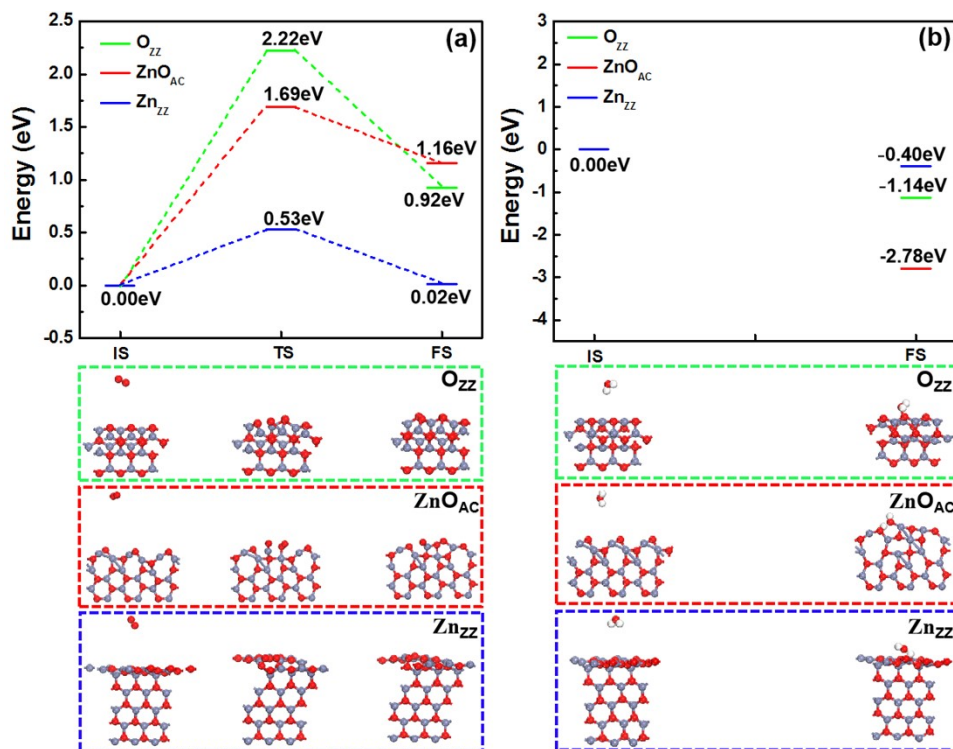

**Fig. S7** The minimum energy reaction pathways for the dissociation of (a) O<sub>2</sub> and (b) H<sub>2</sub>O molecules on three types of reconstructed edges (O<sub>ZZ</sub>, ZnO<sub>AC</sub> and Zn<sub>ZZ</sub>), respectively. The red, gray and white balls represent oxygen, zinc and hydrogen atoms, respectively.

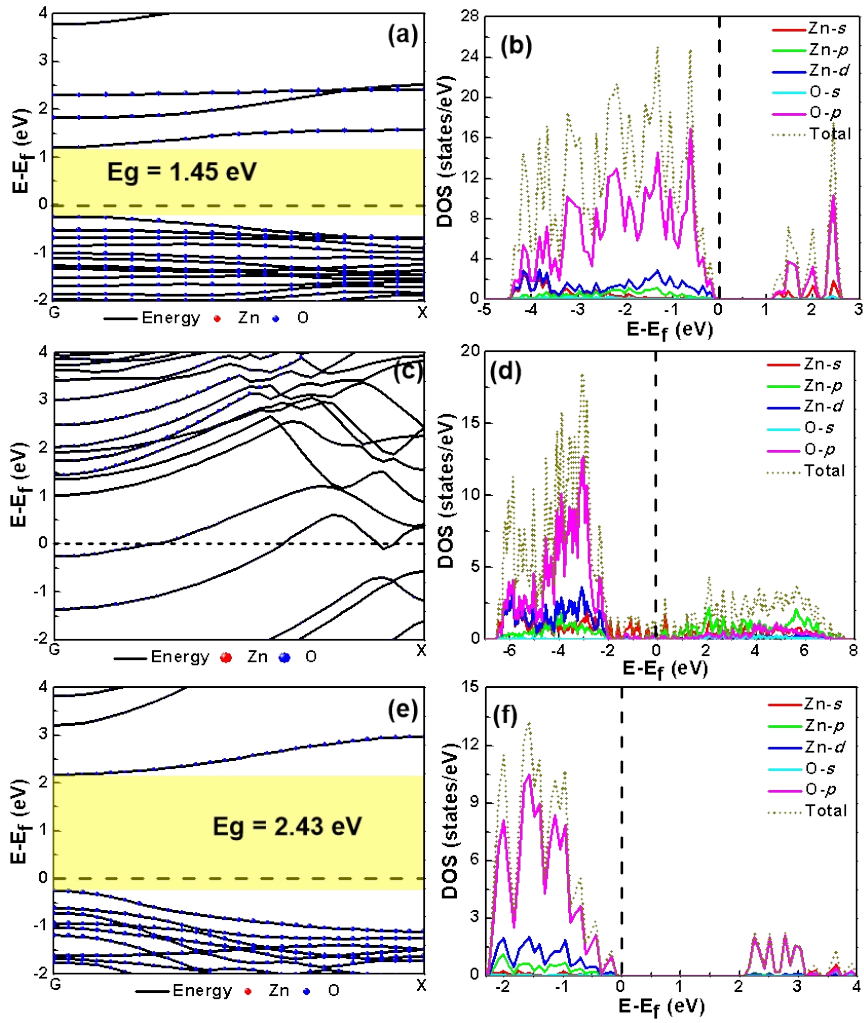

**Fig. S8** The band structures and density of states (DOSs) of the other three stable edge reconstructed structures for (a, b) ZnO<sub>AC</sub>, (c, d) Zn<sub>ZZ</sub>, and (e, f) O<sub>ZZ</sub> at the special concentration of oxygen.
